# Supplementary material for: Hydrogel Beads of Amidoximated Starch and Chitosan as Efficient Sorbents for Inorganic and Organic Compounds
Source: MDPI journal article supplement (doi:10.3390/gels8090549), 2022-08-30
Supplement: s1 [file s1]

# Hydrogel Beads of Amidoximated Starch and Chitosan as Efficient Sorbents for Inorganic and Organic Compounds

Diana Felicia Loghin, Melinda Maria Bazarghideanu, Silvia Vasiliu, Stefania Racovita, Marius-Mihai Zaharia, Tudor Vasiliu and Marcela Mihai \*

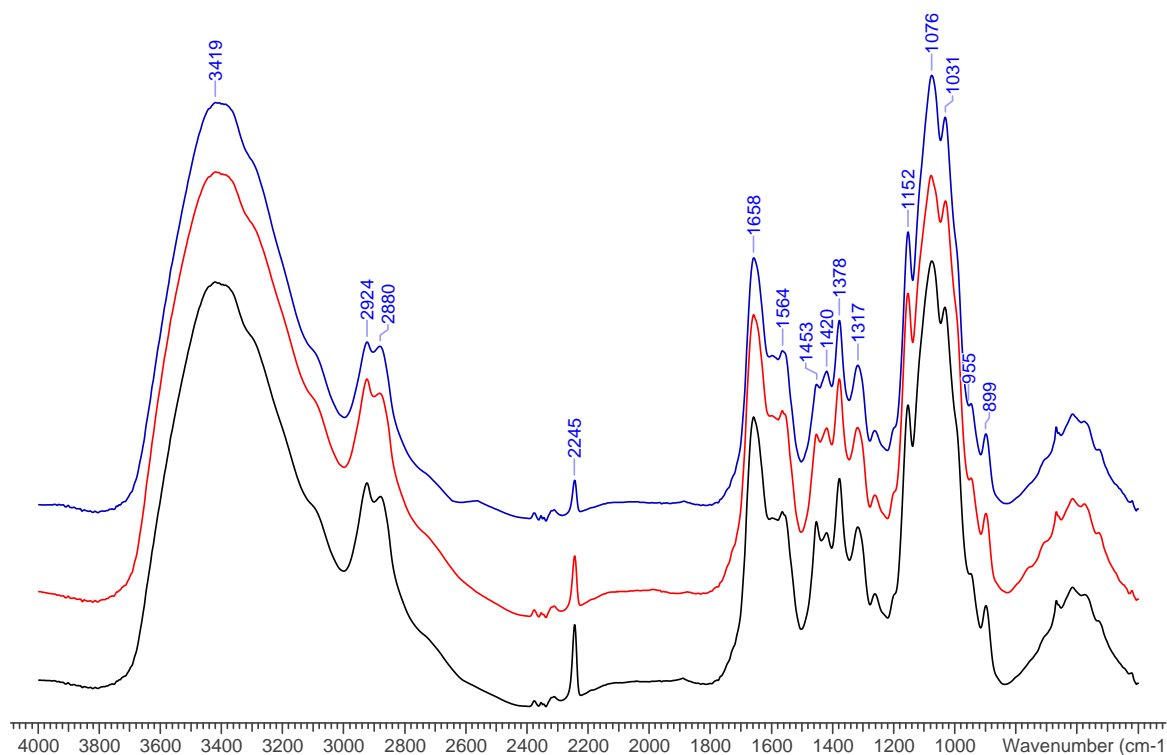

**Figure S1.** FTIR spectra of CS/SgAN (PS—black, WS—red, RS—blue).

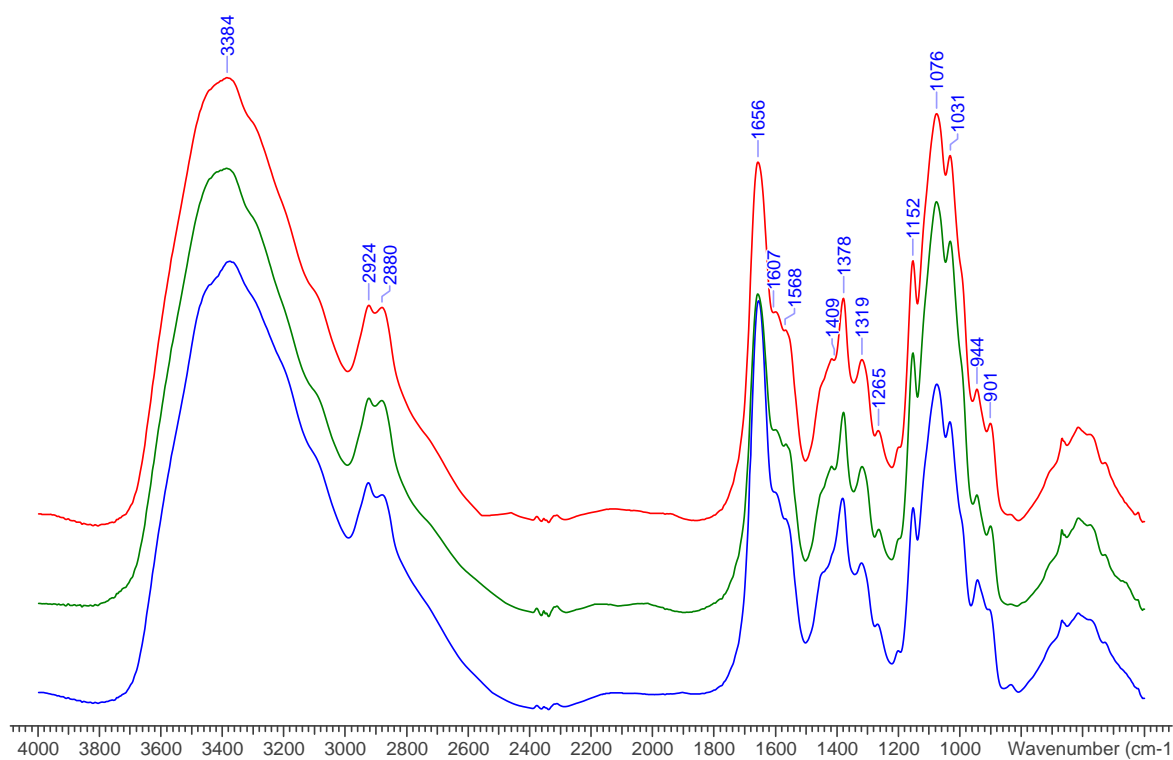

Figure S2. FTIR spectra of CS/SgAN-Ax (PS—black, WS—red, RS—blue).

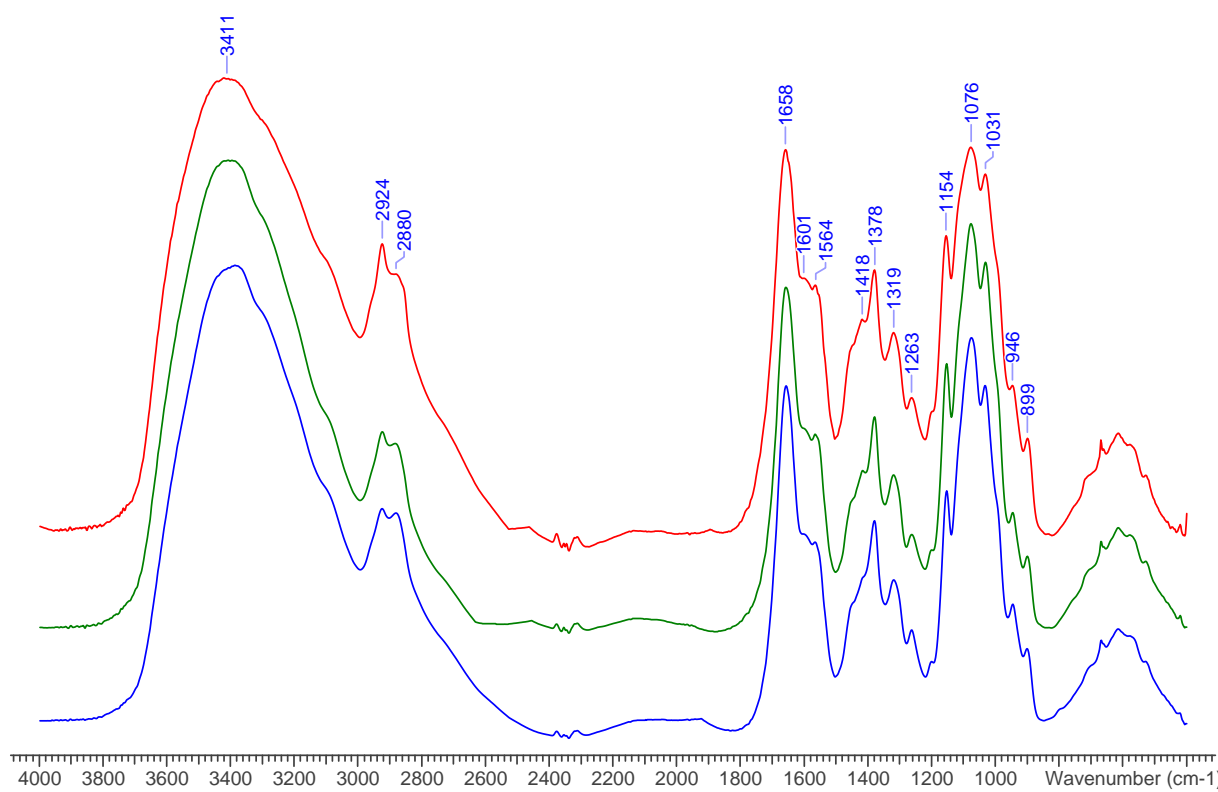

Figure S3. FTIR spectra of CS/SgAx (PS—black, WS—red, RS—blue).

**Table S1.** FTIR spectra deconvolution detailed in the region 1800–1500 cm<sup>-1</sup>.

| Sample      | Wavelength, cm <sup>-1</sup> | Peak hight  | Peak area    |
|-------------|------------------------------|-------------|--------------|
| CS/PSgAx    | 1732                         | 0.01        | 1.2          |
|             | <b>1653</b>                  | <b>0.09</b> | <b>9.3</b>   |
|             | 1591                         | 0.01        | 0.53         |
|             | 1557                         | 0.036       | 2.31         |
| CS/WSgAx    | 1720                         | 0.03        | 2.71         |
|             | <b>1650</b>                  | <b>0.12</b> | <b>11.10</b> |
|             | 1595                         | 0.01        | 0.47         |
|             | 1559                         | 0.05        | 3.59         |
| CS/RSgAx    | 1733                         | 0.02        | 1.1          |
|             | <b>1654</b>                  | <b>0.11</b> | <b>11.0</b>  |
|             | 1593                         | 0.01        | 0.52         |
|             | 1559                         | 0.04        | 2.99         |
| CS/PSgAN-Ax | 1723                         | 0.01        | 0.80         |
|             | <b>1666</b>                  | <b>0.08</b> | <b>5.27</b>  |
|             | 1633                         | 0.03        | 1.21         |
|             | <b>1597</b>                  | <b>0.07</b> | <b>4.18</b>  |
|             | 1551                         | 0.03        | 1.84         |
| CS/WSgAN-Ax | 1709                         | 0.02        | 1.99         |
|             | <b>1660</b>                  | <b>0.07</b> | <b>4.82</b>  |
|             | 1632                         | 0.01        | 0.41         |
|             | <b>1597</b>                  | <b>0.06</b> | <b>4.07</b>  |
|             | 1548                         | 0.02        | 1.29         |
| CS/RSgAN-Ax | 1715                         | 0.02        | 1.48         |
|             | <b>1660</b>                  | <b>0.07</b> | <b>5.58</b>  |
|             | 1629                         | 0.02        | 0.97         |
|             | <b>1597</b>                  | <b>0.03</b> | <b>1.32</b>  |
|             | 1558                         | 0.03        | 2.35         |
